# Supplementary material for: Fabrication of plant-based vitamin D3-fortified nanoemulsions: influence of carrier oil type on vitamin bioaccessibility
Source: Royal Society of Chemistry journal article supplement (doi:10.1039/c9fo00116f), 2019-01-01
Supplement: c9fo00116f1.pdf [file c9fo00116f1.pdf]

**Table 1** Fatty acid composition of corn oil, fish oil and flaxseed oil adopted from literatures.

| Fatty Acid       |          | Corn Oil <sup>1</sup> | Corn Oil <sup>2</sup> | Fish Oil <sup>3</sup> | Fish Oil <sup>4</sup> | Fish Oil <sup>5</sup> | Flaxseed Oil <sup>6</sup> | Flaxseed Oil <sup>7</sup> |
|------------------|----------|-----------------------|-----------------------|-----------------------|-----------------------|-----------------------|---------------------------|---------------------------|
| Saturates        | C10:0    | 0.0                   | 0.0                   | 0.0                   | 0.0                   | 0.0                   | 0.0                       | 0.0                       |
|                  | C12:0    | 0.0                   | 0.0                   | 0.0                   | 0.0                   | 0.0                   | 0.0                       | 0.0                       |
|                  | C14:0    | 0.0                   | 0.0                   | 9.2                   | 3.2                   | 5.2                   | 0.0                       | 0.1                       |
|                  | C15:0    | 0.0                   | 0.0                   | 0.7                   | 0.0                   | 0.0                   | 0.0                       | 0.0                       |
|                  | C16:0    | 11.5                  | 6.5                   | 17.6                  | 7.8                   | 17.6                  | 6.0                       | 6.0                       |
|                  | C17:0    | 2.2                   | 0.0                   | 0.8                   | 0.0                   | 0.0                   | 0.0                       | 0.0                       |
|                  | C18:0    | 0.0                   | 1.4                   | 3.2                   | 2.6                   | 2.4                   | 3.0                       | 4.0                       |
|                  | C20:0    | 0.2                   | 0.1                   | 0.0                   | 0.6                   | 0.0                   | 0.0                       | 0.3                       |
|                  | C22:0    | 0.0                   | 0.0                   | 0.0                   | 0.4                   | 0.0                   | 0.0                       | 0.0                       |
|                  | C24:0    | 0.0                   | 0.1                   | 0.0                   | 0.0                   | 0.0                   | 0.0                       | 0.0                       |
| Mono-unsaturated | C14:1    | 0.0                   | 0.0                   | 0.3                   | 0.0                   | 0.0                   | 0.0                       | 0.0                       |
|                  | C16:1    | 0.0                   | 0.6                   | 11.2                  | 3.9                   | 5.0                   | 0.0                       | 0.3                       |
|                  | C18:1    | 26.6                  | 65.6                  | 9.6                   | 6.1                   | 19.4                  | 16.0                      | 22.4                      |
|                  | C20:1    | 0.0                   | 0.1                   | 0.9                   | 2.0                   | 4.2                   | 0.0                       | 0.3                       |
|                  | C22:1    | 0.0                   | 0.1                   | 0.0                   | 2.5                   | 6.4                   | 0.0                       | 0.0                       |
|                  | C24:1    | 0.0                   | 0.0                   | 0.0                   | 0.2                   | 1.2                   | 0.0                       | 0.0                       |
| Poly-unsaturated | C16:2    | 0.0                   | 0.0                   | 1.4                   | 0.7                   | 0.0                   | 0.0                       | 0.0                       |
|                  | C18:2    | 58.7                  | 25.2                  | 13.0                  | 0.8                   | 3.6                   | 17.0                      | 15.6                      |
|                  | C20:2    | 0.0                   | 0.0                   | 0.0                   | 0.0                   | 0.5                   |                           | 0.0                       |
|                  | C16:3    | 0.0                   | 0.0                   | 1.7                   | 0.0                   | 0.0                   | 0.0                       | 0.0                       |
|                  | C18:3    | 0.8                   | 0.1                   | 1.5                   | 0.2                   | 2.1                   | 58.0                      | 51.0                      |
|                  | C16:4    | 0.0                   | 0.0                   | 1.2                   | 0.0                   | 0.0                   | 0.0                       | 0.0                       |
|                  | C18:4    | 0.0                   | 0.0                   | 3.2                   | 0.0                   | 3.2                   | 0.0                       | 0.0                       |
|                  | C20:4n-6 | 0.0                   | 0.0                   | 1.0                   | 1.5                   | 0.6                   | 0.0                       | 0.0                       |
|                  | C20:4n-3 | 0.0                   | 0.0                   | 1.4                   | 0.2                   | 0.7                   | 0.0                       | 0.0                       |
|                  | C20:5n-3 | 0.0                   | 0.0                   | 14.5                  | 27.0                  | 8.2                   | 0.0                       | 0.0                       |
|                  | C21:5n-3 | 0.0                   | 0.0                   | 0.7                   | 1.5                   | 0.0                   | 0.0                       | 0.0                       |
|                  | C22:5n-3 | 0.0                   | 0.0                   | 2.5                   | 4.8                   | 1.0                   | 0.0                       | 0.0                       |
|                  | C22:6n-3 | 0.0                   | 0.0                   | 9.5                   | 24.0                  | 13.6                  | 0.0                       | 0.0                       |

Reference:

1. Beadle, J. B., et al. "Composition of corn oil." *Journal of the American Oil Chemists' Society* 42.2 (1965): 90-95.
2. Ramos, María Jesús, et al. "Influence of fatty acid composition of raw materials on biodiesel properties." *Bioresource technology* 100.1 (2009): 261-268.
3. Joseph, JEANNE D. "Fatty acid composition of commercial menhaden, *Brevoortia* spp., oils, 1982 and 1983." *Marine Fisheries Review* 47.3 (1985): 30-37.
4. Ulven, Stine M., et al. "Metabolic effects of krill oil are essentially similar to

those of fish oil but at lower dose of EPA and DHA, in healthy volunteers." *Lipids* 46.1 (2011): 37-46.

5. Bell, J. Gordon, et al. "Substituting fish oil with crude palm oil in the diet of Atlantic salmon (*Salmo salar*) affects muscle fatty acid composition and hepatic fatty acid metabolism." *The Journal of nutrition* 132.2 (2002): 222-230.
6. Olomu, J. M., and V. E. Baracos. "Influence of dietary flaxseed oil on the performance, muscle protein deposition, and fatty acid composition of broiler chicks." *Poultry science* 70.6 (1991): 1403-1411.
7. Harper, Charles R., et al. "Flaxseed oil increases the plasma concentrations of cardioprotective (n-3) fatty acids in humans." *The Journal of nutrition* 136.1 (2006): 83-87.
